# Supplementary material for: Aging and Network Properties: Stability Over Time and Links with Learning during Working Memory Training
Source: PubMed Central journal article supplement (PMC5758500; doi:10.3389/fnagi.2017.00419), 2018-01-04
Supplement: Image2.pdf [file Image2.pdf]

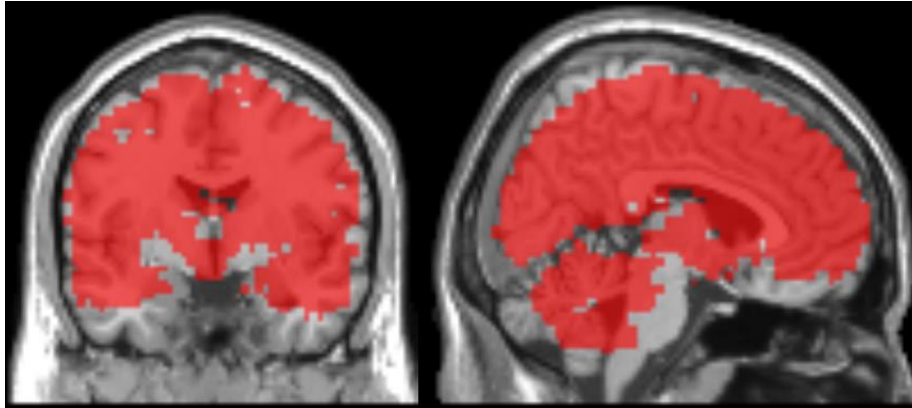

**Supplementary Figure 2. Sample-level signal intensity mask.** Binary masks were calculated for each subject, at each time point, thresholded at  $>70\%$  mean signal intensity (Geerligs et al., 2015), computed over all voxels, using ART ([www.nitrc.org/projects/artifact\\_detect/](http://www.nitrc.org/projects/artifact_detect/)). Then, a sample-level mask was calculated, across all subjects and time points, using logical conjunction. The resulting sample-level mask (red color) is superimposed on the canonical single-subject T1 template part of SPM12, and displayed in coronal (left) and sagittal (right) sections, using MRIcron (<https://www.nitrc.org/projects/mricron/>); see Methods section for details.
